CORRECTION

# Correction: Ethanolamine Signaling Promotes *Salmonella* Niche Recognition and Adaptation during Infection

Christopher J. Anderson, David E. Clark, Mazhar Adli, Melissa M. Kendall

There is a grant number missing from the Funding Statement. Please see the corrected Funding Statement here.

This work is funded by the National Institutes of Health, National Institute of Allergy and Infectious Diseases (AI118732) to MMK and the training grant (5T32AI007046) to CJA. The funders had no role in study design, data collection and analysis, decision to publish, or preparation of the manuscript.

## Reference

1. Anderson CJ, Clark DE, Adli M, Kendall MM (2015) Ethanolamine Signaling Promotes *Salmonella* Niche Recognition and Adaptation during Infection. PLoS Pathog 11(11): e1005278. doi:[10.1371/journal.ppat.1005278](https://doi.org/10.1371/journal.ppat.1005278) PMID: [26565973](https://pubmed.ncbi.nlm.nih.gov/26565973/)

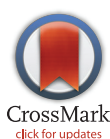

## OPEN ACCESS

**Citation:** Anderson CJ, Clark DE, Adli M, Kendall MM (2015) Correction: Ethanolamine Signaling Promotes *Salmonella* Niche Recognition and Adaptation during Infection. PLoS Pathog 11(12): e1005365. doi:[10.1371/journal.ppat.1005365](https://doi.org/10.1371/journal.ppat.1005365)

**Published:** December 18, 2015

**Copyright:** © 2015 Anderson et al. This is an open access article distributed under the terms of the [Creative Commons Attribution License](https://creativecommons.org/licenses/by/4.0/), which permits unrestricted use, distribution, and reproduction in any medium, provided the original author and source are credited.
